# Supplementary material
Source: PubMed Central journal article supplement (PMC6426127)

## Supplementary Appendix

This appendix has been provided by the authors to give readers additional information about their work.

Supplement to: Grothey A, Sobrero AF, Shields AF, et al. Duration of adjuvant chemotherapy for stage III colon cancer. *N Engl J Med* 2018;378:1177-88. DOI: 10.1056/NEJMoa1713709

**Supplementary Appendices**

Supplementary Tables 1-6

Page 2

Supplementary Figures 1-5

Page 7

**Supplemental Table 1: Trial-specific design of six international randomized clinical trials within the IDEA collaboration**

| <b>Trials (Group)</b>        | <b>Enrolling countries</b>                                        | <b>Accrual time</b> | <b>Stage</b>                       | <b>Tumor location</b> | <b>Treatments</b> | <b>Stratification factors</b>                                                                                                                                                                                             | <b>Additional trial-specific comparison</b>   |
|------------------------------|-------------------------------------------------------------------|---------------------|------------------------------------|-----------------------|-------------------|---------------------------------------------------------------------------------------------------------------------------------------------------------------------------------------------------------------------------|-----------------------------------------------|
| TOSCA (GISCAD)               | Italy                                                             | 06/2007 – 04/2013   | Stage III<br>High-risk<br>Stage II | Colon                 | FOLFOX4<br>CAPOX  | 1) Center<br>2) stage (high-risk stage II vs. III)                                                                                                                                                                        | FOLFOX4+<br>bevacizumab vs.<br>FOLFOX4 alone* |
| SCOT (CACTUS/OCTO)           | UK,<br>Australia,<br>Denmark,<br>Spain,<br>Sweden,<br>New Zealand | 05/2008 – 11/2013   | Stage III<br>High-risk<br>stage II | Colon<br>Rectum       | mFOLFOX6<br>CAPOX | 1) Center<br>2) T stage (1/2 vs. 3 vs. 4)<br>3) N stage (1 vs. 2)<br>4) disease site (Colon vs. Rectum)<br>5) gender (Male vs. Female)<br>6) Regimen (mFOLFOX6 vs. CAPOX)<br>7) initial dose of cap if CAPOX <sup>#</sup> | None                                          |
| IDEA France (PRODIGE/GERCOR) | France                                                            | 05/2009 – 05/2014   | Stage III                          | Colon                 | mFOLFOX6<br>CAPOX | 1) Center<br>2) T stage (1/2 vs. 3 vs. 4)<br>3) N stage (1 vs. 2)<br>4) age (< 70 vs. >= 70)<br>5) PS (0 vs. 1 vs. 2)                                                                                                     | None                                          |
| C80702 (CALGB/SWOG)          | USA,<br>Canada                                                    | 07/2010 – 11/2015   | Stage III                          | Colon                 | mFOLFOX6          | 1) N stage (1 vs. 2)<br>2) low dose aspirin use (yes vs. no)                                                                                                                                                              | 3 years of celecoxib<br>vs. placebo           |
| HORG (HORG)                  | Greece                                                            | 04/2009 – 12/2015   | Stage III<br>High-risk<br>stage II | Colon                 | FOLFOX4<br>CAPOX  | 1) center<br>2) stage (high-risk stage II vs. III)<br>3) obstruction or perforation (yes vs. no)                                                                                                                          | None                                          |
| ACHIEVE (JFMC)               | Japan                                                             | 08/2012 – 06/2014   | Stage III                          | Colon                 | mFOLFOX6<br>CAPOX | 1) Centers<br>2) N stage (1 vs. 2)<br>3) Primary site (colon vs. rectosigmoid vs. multiple)<br>4) Age (< 70 vs. >= 70)<br>5) Regimen (mFOLFOX6 vs. CAPOX)                                                                 | None                                          |

<sup>#</sup>Introduced in Feb 2010; \*5% of patients in TOSCA received bevacizumab

**Supplemental Table 2: TNM Classification of colon cancer by American Joint Committee on Cancer (AJCC), 7<sup>th</sup> edition**

| Primary tumor (T) |                                                                                                                                | Lymph nodes (N) |                                                                                                                             | Distant metastasis (M) |                                                                                                                              |
|-------------------|--------------------------------------------------------------------------------------------------------------------------------|-----------------|-----------------------------------------------------------------------------------------------------------------------------|------------------------|------------------------------------------------------------------------------------------------------------------------------|
| Category          | Description                                                                                                                    | Category        | Description                                                                                                                 | Category               | Description                                                                                                                  |
| T0                | No evidence of primary tumor                                                                                                   | N0              | No regional lymph node metastasis                                                                                           | M0                     | No distant metastasis                                                                                                        |
| T1                | Tumor invades submucosa                                                                                                        | N1              | Metastasis in 1-3 regional lymph nodes (metastasis in 1 lymph node: N1a; metastases in 2-3 lymph nodes: N1b)                | M1                     | Distant metastasis (metastasis confined to one organ or site: M1a; metastases in more than one organ/site or the peritoneum) |
| T2                | Tumor invades muscularis propria                                                                                               | N2              | Metastases in 4 or more regional lymph nodes (metastases in 4-6 lymph nodes: N2a; metastases in 7 or more lymph nodes: N2b) |                        |                                                                                                                              |
| T3                | Tumor invades through the muscularis propria into pericolorectal tissues                                                       |                 |                                                                                                                             |                        |                                                                                                                              |
| T4                | Tumor penetrates to the surface of the visceral peritoneum (T4a) or invades or is adherent to other organs or structures (T4b) |                 |                                                                                                                             |                        |                                                                                                                              |

Edge SB, Byrd SR, Compton CC, et al., editors. AJCC Cancer Staging Manual. 7th edition Springer-Verlag; New York (NY): 2010. pp. 143–164.

**Supplemental Table 3: Patient characteristics by treatment regimen in the IDEA mITT population**

| Patient characteristics               | FOLFOX               |                      |                   | CAPOX                |                      |                   |
|---------------------------------------|----------------------|----------------------|-------------------|----------------------|----------------------|-------------------|
|                                       | 3 Months<br>(N=3870) | 6 Months<br>(N=3893) | Total<br>(N=7763) | 3 Months<br>(N=2554) | 6 Months<br>(N=2517) | Total<br>(N=5071) |
| <b>Age, years</b>                     |                      |                      |                   |                      |                      |                   |
| Median (Range)                        | 64.0 (20, 87)        | 64.0 (19, 88)        | 64.0 (19, 88)     | 65.0 (25, 84)        | 65.0 (18, 85)        | 65.0 (18, 85)     |
| Missing                               | 0                    | 2                    | 2                 | 0                    | 0                    | 0                 |
| <b>Gender, n (%)</b>                  |                      |                      |                   |                      |                      |                   |
| Male                                  | 2170 (56.1%)         | 2173 (55.8%)         | 4343 (56.0%)      | 1468 (57.5%)         | 1432 (56.9%)         | 2900 (57.2%)      |
| Female                                | 1699 (43.9%)         | 1720 (44.2%)         | 3419 (44.0%)      | 1086 (42.5%)         | 1085 (43.1%)         | 2171 (42.8%)      |
| Missing                               | 1                    | 0                    | 1                 | 0                    | 0                    | 0                 |
| <b>ECOG Performance Status, n (%)</b> |                      |                      |                   |                      |                      |                   |
| 0                                     | 3000 (77.5%)         | 3021 (77.6%)         | 6021 (77.6%)      | 2084 (81.6%)         | 2027 (80.6%)         | 4111 (81.1%)      |
| 1                                     | 844 (21.8%)          | 846 (21.7%)          | 1690 (21.8%)      | 465 (18.2%)          | 487 (19.4%)          | 952 (18.8%)       |
| 2                                     | 25 (0.6%)            | 26 (0.7%)            | 51 (0.7%)         | 4 (0.2%)             | 2 (0.1%)             | 6 (0.1%)          |
| Missing                               | 1                    | 0                    | 1                 | 1                    | 1                    | 2                 |
| <b>T Stage, n (%)</b>                 |                      |                      |                   |                      |                      |                   |
| T0                                    | 0                    | 1 (0.0%)             | 1 (0.0%)          | 0                    | 2 (0.1%)             | 2 (0.0%)          |
| T1                                    | 168 (4.4%)           | 151 (3.9%)           | 319 (4.1%)        | 88 (3.5%)            | 86 (3.4%)            | 174 (3.4%)        |
| T2                                    | 347 (9.0%)           | 391 (10.2%)          | 738 (9.6%)        | 246 (9.7%)           | 213 (8.5%)           | 459 (9.1%)        |
| T3                                    | 2617 (68.1%)         | 2586 (67.2%)         | 5203 (67.7%)      | 1602 (62.9%)         | 1595 (63.5%)         | 3197 (63.2%)      |
| T4                                    | 709 (18.5%)          | 718 (18.7%)          | 1427 (18.6%)      | 611 (24.0%)          | 617 (24.6%)          | 1228 (24.3%)      |
| Missing                               | 29                   | 46                   | 75                | 7                    | 4                    | 11                |
| <b>N Stage, n (%)</b>                 |                      |                      |                   |                      |                      |                   |
| N0                                    | 3 (0.1%)             | 3 (0.1%)             | 6 (0.1%)          | 2 (0.1%)             | 1 (0.0%)             | 3 (0.1%)          |
| N1                                    | 2762 (72.0%)         | 2792 (72.6%)         | 5554 (72.3%)      | 1821 (71.4%)         | 1793 (71.3%)         | 3614 (71.4%)      |
| N2                                    | 1072 (27.9%)         | 1049 (27.3%)         | 2121 (27.6%)      | 726 (28.5%)          | 720 (28.6%)          | 1446 (28.6%)      |
| Missing                               | 33                   | 49                   | 82                | 5                    | 3                    | 8                 |
| <b>Risk Group, n (%)</b>              |                      |                      |                   |                      |                      |                   |
| T1-3 N1                               | 2311 (60.3%)         | 2308 (60.1%)         | 4619 (60.2%)      | 1433 (56.3%)         | 1419 (56.5%)         | 2852 (56.4%)      |
| T4 or N2                              | 1523 (39.7%)         | 1531 (39.9%)         | 3054 (39.8%)      | 1111 (43.7%)         | 1091 (43.5%)         | 2202 (43.6%)      |
| Missing                               | 36                   | 54                   | 90                | 10                   | 7                    | 17                |
| <b>Number of Lymph Nodes Examined</b> |                      |                      |                   |                      |                      |                   |
| Median (Range)                        | 19.0 (0, 132)        | 19.0 (1, 99)         | 19.0 (0, 132)     | 19.0 (2, 104)        | 19.0 (1, 122)        | 19.0 (1, 122)     |
| Missing                               | 694                  | 711                  | 1405              | 1336                 | 1322                 | 2658              |
| <b>Histological Grade, n (%)</b>      |                      |                      |                   |                      |                      |                   |
| Grade 1/2                             | 1624 (84.5%)         | 1670 (85.2%)         | 3294 (84.9%)      | 1062 (88.0%)         | 1043 (88.4%)         | 2105 (88.2%)      |
| Grade 3/4                             | 297 (15.5%)          | 290 (14.8%)          | 587 (15.1%)       | 145 (12.0%)          | 137 (11.6%)          | 282 (11.8%)       |
| Missing                               | 1949                 | 1933                 | 3882              | 1347                 | 1337                 | 2684              |

**Supplementary Table 4. Selected Adverse Events, According to Treatment and Duration of Therapy.\***

| Adverse Event                     | Number of Patients<br>with Available<br>Adverse Event Data | FOLFOX      |                             |              | P Value | CAPOX   |                             |              | P Value    |
|-----------------------------------|------------------------------------------------------------|-------------|-----------------------------|--------------|---------|---------|-----------------------------|--------------|------------|
|                                   |                                                            | Grade 1     | Grade 2<br>number (percent) | Grade 3 or 4 |         | Grade 1 | Grade 2<br>number (percent) | Grade 3 or 4 |            |
| Any adverse event                 |                                                            |             |                             |              | <0.001  |         |                             |              | <0.001     |
| 3 mo                              | 3283                                                       | 1008 (30.7) | 1039 (31.6)                 | 1236 (37.6)  |         | 1416    | 496 (35.0)                  | 578 (40.8)   | 342 (24.2) |
| 6 mo                              | 3293                                                       | 363 (11.0)  | 1056 (32.1)                 | 1874 (56.9)  |         | 1389    | 203 (14.6)                  | 674 (48.5)   | 512 (36.9) |
| Peripheral sensory neurotoxicity† |                                                            |             |                             |              | <0.001  |         |                             |              | <0.001     |
| 3 mo                              | 3191                                                       | 2661 (83.4) | 450 (14.1)                  | 80 (2.5)     |         | 1412    | 1211 (85.8)                 | 164 (11.6)   | 37 (2.6)   |
| 6 mo                              | 3255                                                       | 1700 (52.2) | 1036 (31.8)                 | 519 (15.9)   |         | 1387    | 763 (55.0)                  | 500 (36.0)   | 124 (8.9)  |
| Diarrhea                          |                                                            |             |                             |              | <0.001  |         |                             |              | 0.01       |
| 3 mo                              | 3114                                                       | 2611 (83.8) | 356 (11.4)                  | 147 (4.7)    |         | 1414    | 1171 (82.8)                 | 139 (9.8)    | 104 (7.4)  |
| 6 mo                              | 3163                                                       | 2525 (79.8) | 411 (13.0)                  | 227 (7.2)    |         | 1388    | 1090 (78.5)                 | 176 (12.7)   | 122 (8.8)  |
| Febrile neutropenia               |                                                            |             |                             |              | 0.33    |         |                             |              | 0.04       |
| 3 mo                              | 2966                                                       | 2897 (97.7) | 7 (0.2)                     | 62 (2.1)     |         | 1415    | 1407 (99.4)                 | 6 (0.4)      | 2 (0.1)    |
| 6 mo                              | 3021                                                       | 2933 (97.1) | 20 (0.7)                    | 68 (2.3)     |         | 1390    | 1373 (98.8)                 | 9 (0.6)      | 8 (0.6)    |
| Neutropenia                       |                                                            |             |                             |              | <0.001  |         |                             |              | <0.001     |
| 3 mo                              | 1974                                                       | 1310 (66.4) | 264 (13.4)                  | 400 (20.3)   |         | 1223    | 898 (73.4)                  | 231 (18.9)   | 94 (7.7)   |
| 6 mo                              | 2010                                                       | 1087 (54.1) | 389 (19.4)                  | 534 (26.6)   |         | 1197    | 733 (61.2)                  | 321 (26.8)   | 143 (11.9) |
| Thrombocytopenia                  |                                                            |             |                             |              | <0.001  |         |                             |              | <0.001     |
| 3 mo                              | 1970                                                       | 1812 (92.0) | 139 (7.1)                   | 19 (1.0)     |         | 1223    | 1104 (90.3)                 | 93 (7.6)     | 26 (2.1)   |
| 6 mo                              | 2004                                                       | 1703 (85.0) | 264 (13.2)                  | 37 (1.8)     |         | 1197    | 966 (80.7)                  | 181 (15.1)   | 50 (4.2)   |
| Nausea                            |                                                            |             |                             |              | <0.001  |         |                             |              | 0.02       |
| 3 mo                              | 1973                                                       | 1729 (87.6) | 213 (10.8)                  | 31 (1.6)     |         | 1224    | 1070 (87.4)                 | 117 (9.6)    | 37 (3.0)   |
| 6 mo                              | 2008                                                       | 1636 (81.5) | 327 (16.3)                  | 45 (2.2)     |         | 1197    | 997 (83.3)                  | 163 (13.6)   | 37 (3.1)   |
| Vomiting                          |                                                            |             |                             |              | 0.29    |         |                             |              | 0.91       |
| 3 mo                              | 1970                                                       | 1863 (94.6) | 82 (4.2)                    | 25 (1.3)     |         | 1224    | 1151 (94.0)                 | 48 (3.9)     | 25 (2.0)   |
| 6 mo                              | 2006                                                       | 1878 (93.6) | 101 (5.0)                   | 27 (1.3)     |         | 1197    | 1119 (93.5)                 | 62 (5.2)     | 16 (1.3)   |
| Mucositis                         |                                                            |             |                             |              | <0.001  |         |                             |              | 0.007      |
| 3 mo                              | 1081                                                       | 1029 (95.2) | 44 (4.1)                    | 8 (0.7)      |         | 1117    | 1085 (97.1)                 | 29 (2.6)     | 3 (0.3)    |
| 6 mo                              | 1099                                                       | 1005 (91.4) | 76 (6.9)                    | 18 (1.6)     |         | 1104    | 1050 (95.1)                 | 44 (4.0)     | 10 (0.9)   |
| Fatigue                           |                                                            |             |                             |              | <0.001  |         |                             |              | <0.001     |
| 3 mo                              | 1971                                                       | 1722 (87.4) | 215 (10.9)                  | 34 (1.7)     |         | 1224    | 1130 (92.3)                 | 82 (6.7)     | 12 (1.0)   |
| 6 mo                              | 2003                                                       | 1594 (79.6) | 327 (16.3)                  | 82 (4.1)     |         | 1197    | 1034 (86.4)                 | 129 (10.8)   | 34 (2.8)   |
| Hand-foot syndrome                |                                                            |             |                             |              | 0.03    |         |                             |              | <0.001     |
| 3 mo                              | 311                                                        | 307 (98.7)  | 4 (1.3)                     | 0            |         | 693     | 654 (94.4)                  | 34 (4.9)     | 5 (0.7)    |
| 6 mo                              | 306                                                        | 294 (96.1)  | 11 (3.6)                    | 1 (0.3)      |         | 688     | 593 (86.2)                  | 77 (11.2)    | 18 (2.6)   |

\* Listed are the maximal grades of adverse events that were reported during the treatment period. In addition to the listed grades of adverse events, 19 patients had grade 5 events. In the SCOT trial, data regarding adverse events were collected only for the first 617 patients who were enrolled. P values are for the overall comparison of the three grade levels. All the P values were calculated by means of the chi-square test for trend.

† The listed grades of peripheral sensory neurotoxicity represent the maximal levels at any time after randomization.

**Supplemental Table 5: Disease-free survival by regimen and risk group**

DFS = disease-free survival, HR = hazard ratio, CI = confidence interval

| 3 yr DFS rate (%) and HR by regimen and risk group |                                 | Regimen                    |                            |                            |                            |                            |                            |                                                                           |                            |                            |
|----------------------------------------------------|---------------------------------|----------------------------|----------------------------|----------------------------|----------------------------|----------------------------|----------------------------|---------------------------------------------------------------------------|----------------------------|----------------------------|
|                                                    |                                 | CAPOX                      |                            |                            | FOLFOX                     |                            |                            | CAPOX/FOLFOX combined                                                     |                            |                            |
|                                                    |                                 | 3 yr DFS, % (95% CI)       |                            | HR (95% CI)                | 3 yr DFS, % (95% CI)       |                            | HR (95% CI)                | 3 yr DFS, % (95% CI)                                                      |                            | HR (95% CI)                |
|                                                    |                                 | 3 m                        | 6 m                        |                            | 3 m                        | 6 m                        |                            | 3 m                                                                       | 6 m                        |                            |
| Risk group                                         | Low-risk (T1-3 N1) ~60%         | <b>85.0</b><br>(83.1-86.9) | <b>83.1</b><br>(81.1-85.2) | <b>0.85</b><br>(0.71-1.01) | <b>81.9</b><br>(80.2-83.6) | <b>83.5</b><br>(81.9-85.1) | <b>1.10</b><br>(0.96-1.26) | <b>83.1</b><br>(81.8-84.4)                                                | <b>83.3</b><br>(82.1-84.6) | <b>1.01</b><br>(0.90-1.12) |
|                                                    | High-risk (T4 and / or N2) ~40% | <b>64.1</b><br>(61.3-67.1) | <b>64.0</b><br>(61.2-67.0) | <b>1.02</b><br>(0.89-1.17) | <b>61.5</b><br>(58.9-64.1) | <b>64.7</b><br>(62.2-67.3) | <b>1.20</b><br>(1.07-1.35) | <b>62.7</b><br>(60.8-64.4)                                                | <b>64.4</b><br>(62.6-66.4) | <b>1.12</b><br>(1.03-1.23) |
|                                                    | Risk groups combined            | <b>75.9</b><br>(74.2-77.6) | <b>74.8</b><br>(73.1-76.6) | <b>0.95</b><br>(0.85-1.06) | <b>73.6</b><br>(72.2-75.1) | <b>76.0</b><br>(74.6-77.5) | <b>1.16</b><br>(1.06-1.26) | <b>P-value interaction test:<br/>Regimen: 0.0061<br/>Risk group: 0.11</b> |                            |                            |

Non-inferior

Not proven

Inferior

**Supplemental Table 6: Disease evaluation and follow-up by study**

| <b>Study</b>       | <b>3 Month arm</b>                                                                                                                                                              | <b>6 Month arm</b>                                                                                                                                                             |
|--------------------|---------------------------------------------------------------------------------------------------------------------------------------------------------------------------------|--------------------------------------------------------------------------------------------------------------------------------------------------------------------------------|
| <b>ACHIEVE</b>     | Every 6 months up to 6 years post registration.                                                                                                                                 |                                                                                                                                                                                |
| <b>C80702</b>      | First imaging within 4 months after completion of FOLFOX, then every 6 months until at least 3 years after initiation of celecoxib/placebo, then yearly for 3 years or until PD | First imaging within 6 weeks of finishing FOLFOX then same as 3 months arm.                                                                                                    |
| <b>IDEA France</b> | Every 6 months until year 3 then yearly until year 8                                                                                                                            | At month 3 and 6. Then every 6 months until year 3; then yearly until year 8.                                                                                                  |
| <b>HORG</b>        | First assessment at month 12, then every 6 months until year 3, then every 12 months until year 8.                                                                              |                                                                                                                                                                                |
| <b>SCOT</b>        | Every 6 months post-registration, up to 3 years.                                                                                                                                |                                                                                                                                                                                |
| <b>TOSCA</b>       | FOLFOX: 6 months follow-up visit, then every 6 months up to 5 years.<br>CAPOX: 6 months follow-up visit, then every 6 months up to 3 years.                                     | FOLFOX: 3-4 weeks end of treatment visit (~6 months) and every 6 months up to 5 years.<br>CAPOX: 3-4 weeks end of treatment visit (~6 months) and every 6 months up to 3 years |



**Supplemental Figure 1: CONSORT diagram**

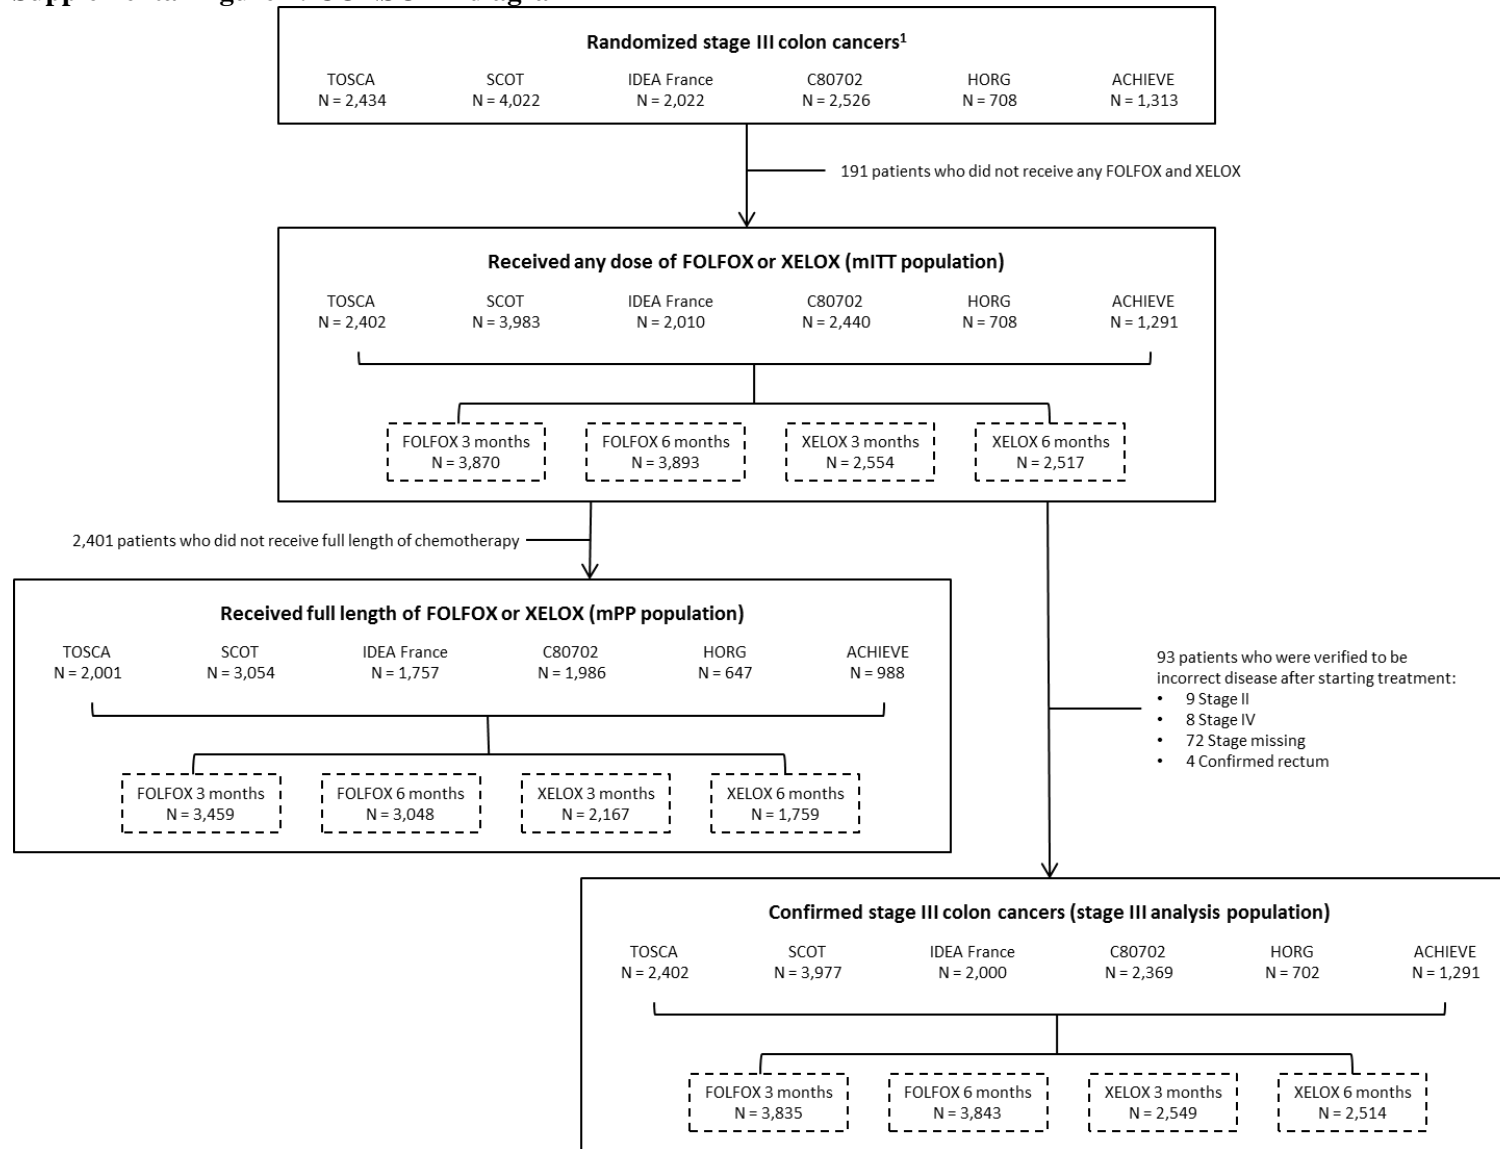

<sup>1</sup>stage III colon cancer deemed at registration

Supplemental Figure 2: Comparing DFS between patients assigned to 3m vs. 6m of adjuvant therapy by subgroups

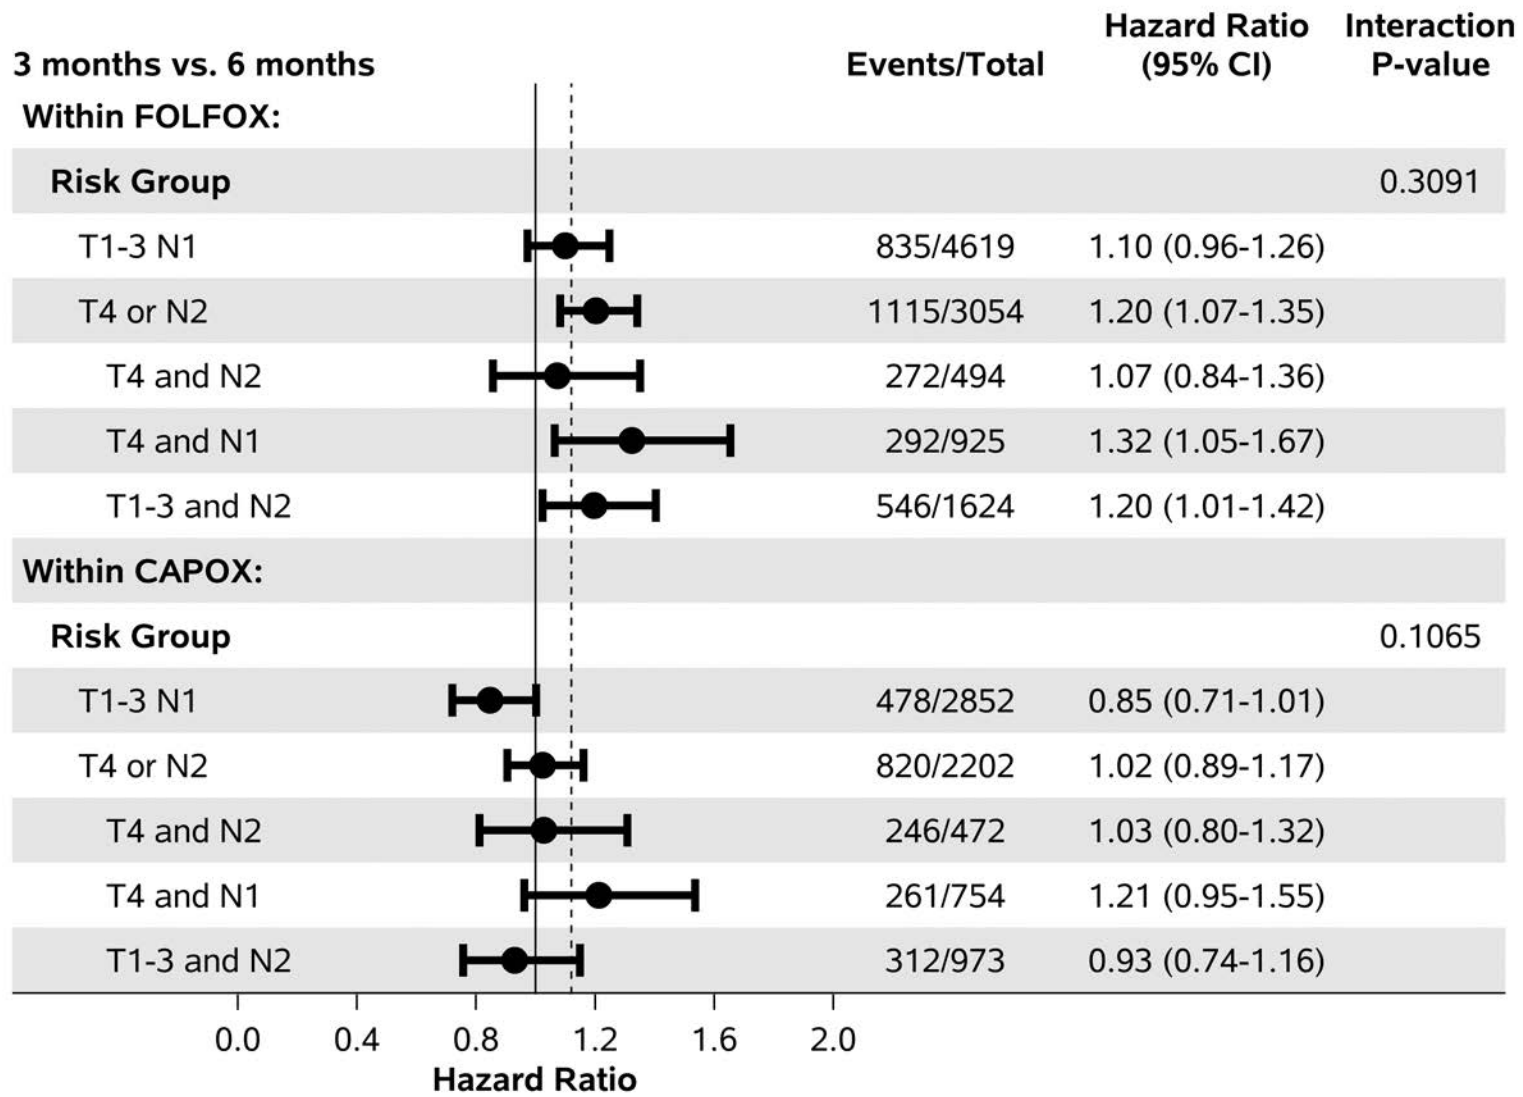

DFS, disease-free survival; CI, confidence interval

**Supplemental Figure 3: Forest plots of individual trial results by regimen and risk group**

**Supplemental Fig 3A: Results for FOLFOX in high-risk group**

| <b>FOLFOX: T4 or N2<br/>3 months vs. 6 months</b> |                                 | <b>Total</b> | <b>Hazard Ratio<br/>(95% CI)</b> | <b>Sup p</b> | <b>NI p</b> |
|---------------------------------------------------|---------------------------------|--------------|----------------------------------|--------------|-------------|
| ACHIEVE                                           | <small>Q p-value 0.3250</small> | 158          | 1.13 (0.69-1.85)                 | 0.6328       | 0.5120      |
| SCOT                                              |                                 | 646          | 1.10 (0.85-1.42)                 | 0.4767       | 0.4421      |
| HORG                                              |                                 | 136          | 0.89 (0.52-1.52)                 | 0.6618       | 0.1968      |
| TOSCA                                             |                                 | 548          | 1.02 (0.77-1.36)                 | 0.8733       | 0.2645      |
| IDEA France                                       |                                 | 702          | 1.44 (1.14-1.82)                 | 0.0022       | 0.9824      |
| C80702                                            |                                 | 864          | 1.30 (1.03-1.64)                 | 0.0278       | 0.8919      |
| All Studies                                       |                                 | 3054         | 1.20 (1.07-1.35)                 | 0.0021       | 0.8825      |

**Supplemental Fig 3B: Results for FOLFOX in low-risk group**

| <b>FOLFOX: T1-3 N1<br/>3 months vs. 6 months</b> |                                 | <b>Total</b> | <b>Hazard Ratio<br/>(95% CI)</b> | <b>Sup p</b> | <b>NI p</b> |
|--------------------------------------------------|---------------------------------|--------------|----------------------------------|--------------|-------------|
| ACHIEVE                                          | <small>Q p-value 0.2254</small> | 164          | 1.22 (0.56-2.65)                 | 0.6195       | 0.5828      |
| SCOT                                             |                                 | 687          | 1.40 (0.95-2.07)                 | 0.0852       | 0.8728      |
| HORG                                             |                                 | 158          | 0.67 (0.33-1.39)                 | 0.2766       | 0.0834      |
| TOSCA                                            |                                 | 997          | 1.23 (0.94-1.60)                 | 0.1259       | 0.7554      |
| IDEA France                                      |                                 | 1106         | 1.15 (0.89-1.49)                 | 0.2847       | 0.5838      |
| C80702                                           |                                 | 1507         | 0.89 (0.68-1.15)                 | 0.3767       | 0.0413      |
| All Studies                                      |                                 | 4619         | 1.10 (0.96-1.26)                 | 0.1697       | 0.3968      |

**Supplemental Fig 3C: Results for CAPOX in high-risk group**

| <b>CAPOX: T4 or N2<br/>3 months vs. 6 months</b> |                                 | <b>Total</b> | <b>Hazard Ratio<br/>(95% CI)</b> | <b>Sup p</b> | <b>NI p</b> |
|--------------------------------------------------|---------------------------------|--------------|----------------------------------|--------------|-------------|
| ACHIEVE                                          | <small>Q p-value 0.9339</small> | 415          | 1.10 (0.79-1.55)                 | 0.5664       | 0.4681      |
| SCOT                                             |                                 | 1304         | 1.04 (0.88-1.24)                 | 0.6396       | 0.2080      |
| HORG                                             |                                 | 152          | 0.89 (0.52-1.53)                 | 0.6782       | 0.2033      |
| TOSCA                                            |                                 | 269          | 0.94 (0.63-1.40)                 | 0.7532       | 0.1930      |
| IDEA France                                      |                                 | 62           | 0.87 (0.40-1.88)                 | 0.7227       | 0.2606      |
| C80702                                           |                                 |              |                                  |              |             |
| All Studies                                      |                                 | 2202         | 1.02 (0.89-1.17)                 | 0.7454       | 0.0974      |

**Supplemental Fig 3D: Results for CAPOX in low-risk group**

| <b>CAPOX: T1-3 N1<br/>3 months vs. 6 months</b> |                                 | <b>Total</b> | <b>Hazard Ratio<br/>(95% CI)</b> | <b>Sup p</b> | <b>NI p</b> |
|-------------------------------------------------|---------------------------------|--------------|----------------------------------|--------------|-------------|
| ACHIEVE                                         | <small>Q p-value 0.2846</small> | 554          | 0.60 (0.35-1.03)                 | 0.0595       | 0.0118      |
| SCOT                                            |                                 | 1345         | 0.75 (0.58-0.98)                 | 0.0343       | 0.0016      |
| HORG                                            |                                 | 258          | 1.31 (0.80-2.15)                 | 0.2812       | 0.7351      |
| TOSCA                                           |                                 | 556          | 0.92 (0.62-1.36)                 | 0.6638       | 0.1600      |
| IDEA France                                     |                                 | 139          | 1.10 (0.58-2.10)                 | 0.7691       | 0.4793      |
| C80702                                          |                                 |              |                                  |              |             |
| All Studies                                     |                                 | 2852         | 0.85 (0.71-1.01)                 | 0.0701       | 0.0012      |

Supplemental Fig 4: Forest plots of results in the per-protocol population

Supplemental Fig 4A: Results comparing 3 months versus patients receiving at least 5 months of adjuvant therapy

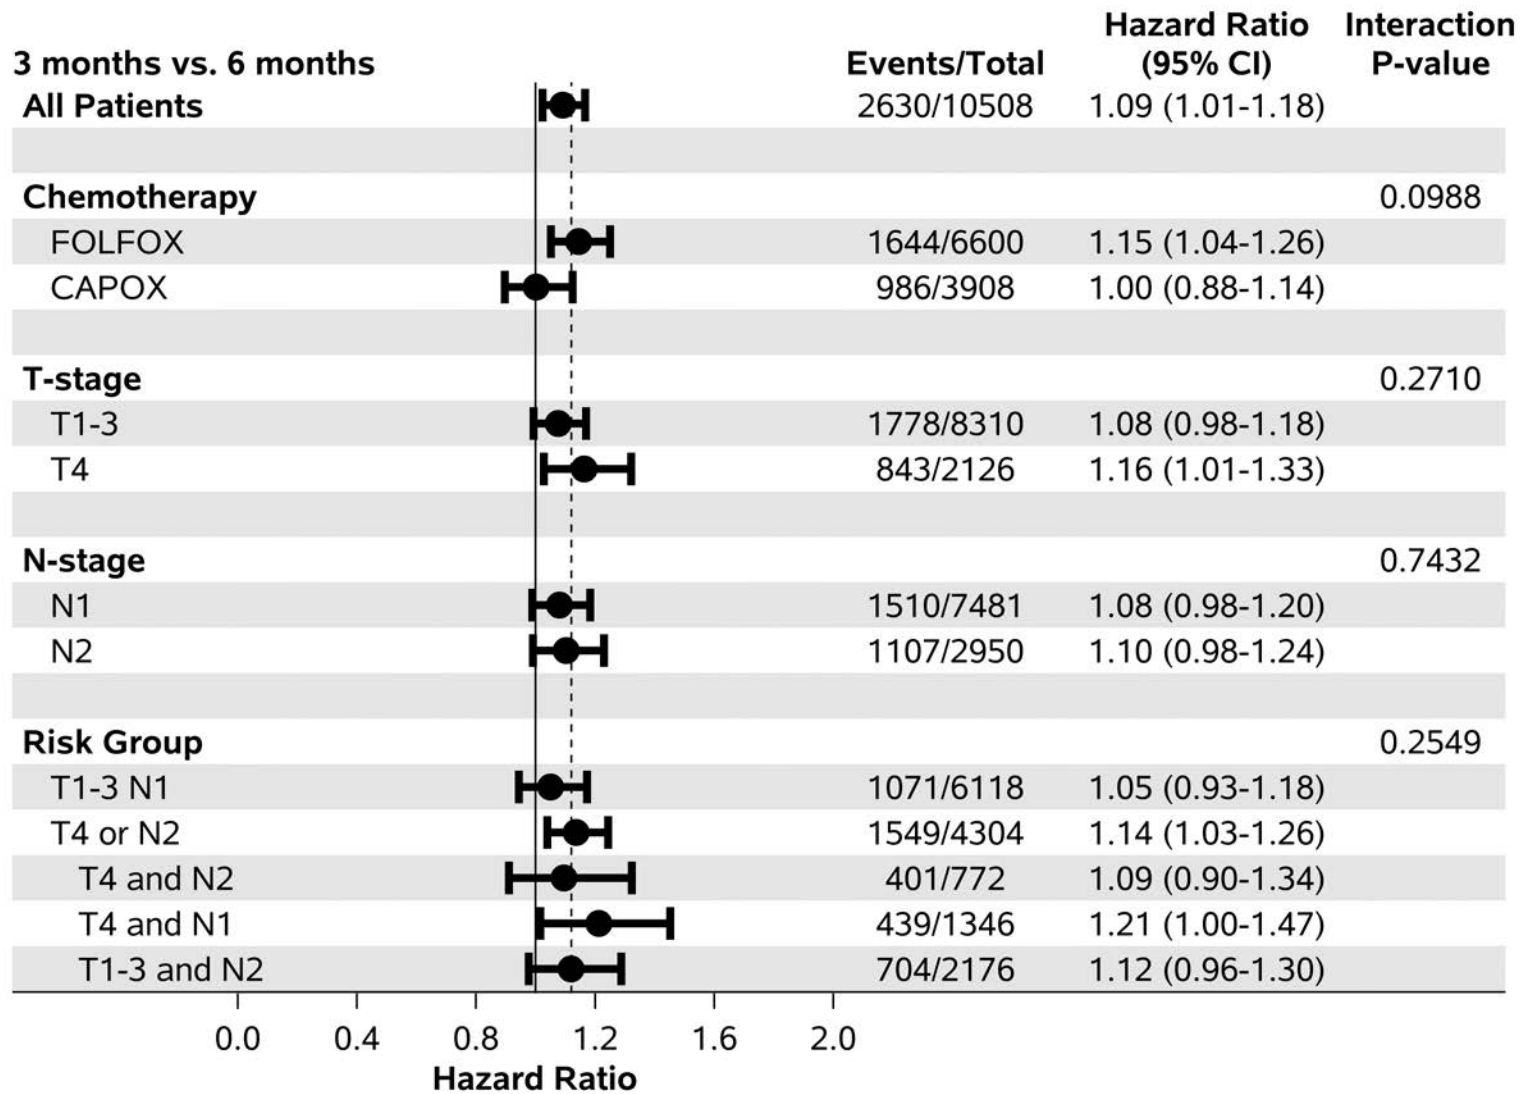

Supplemental Fig 4B: Results comparing 3 months versus patients receiving 6 months of adjuvant therapy

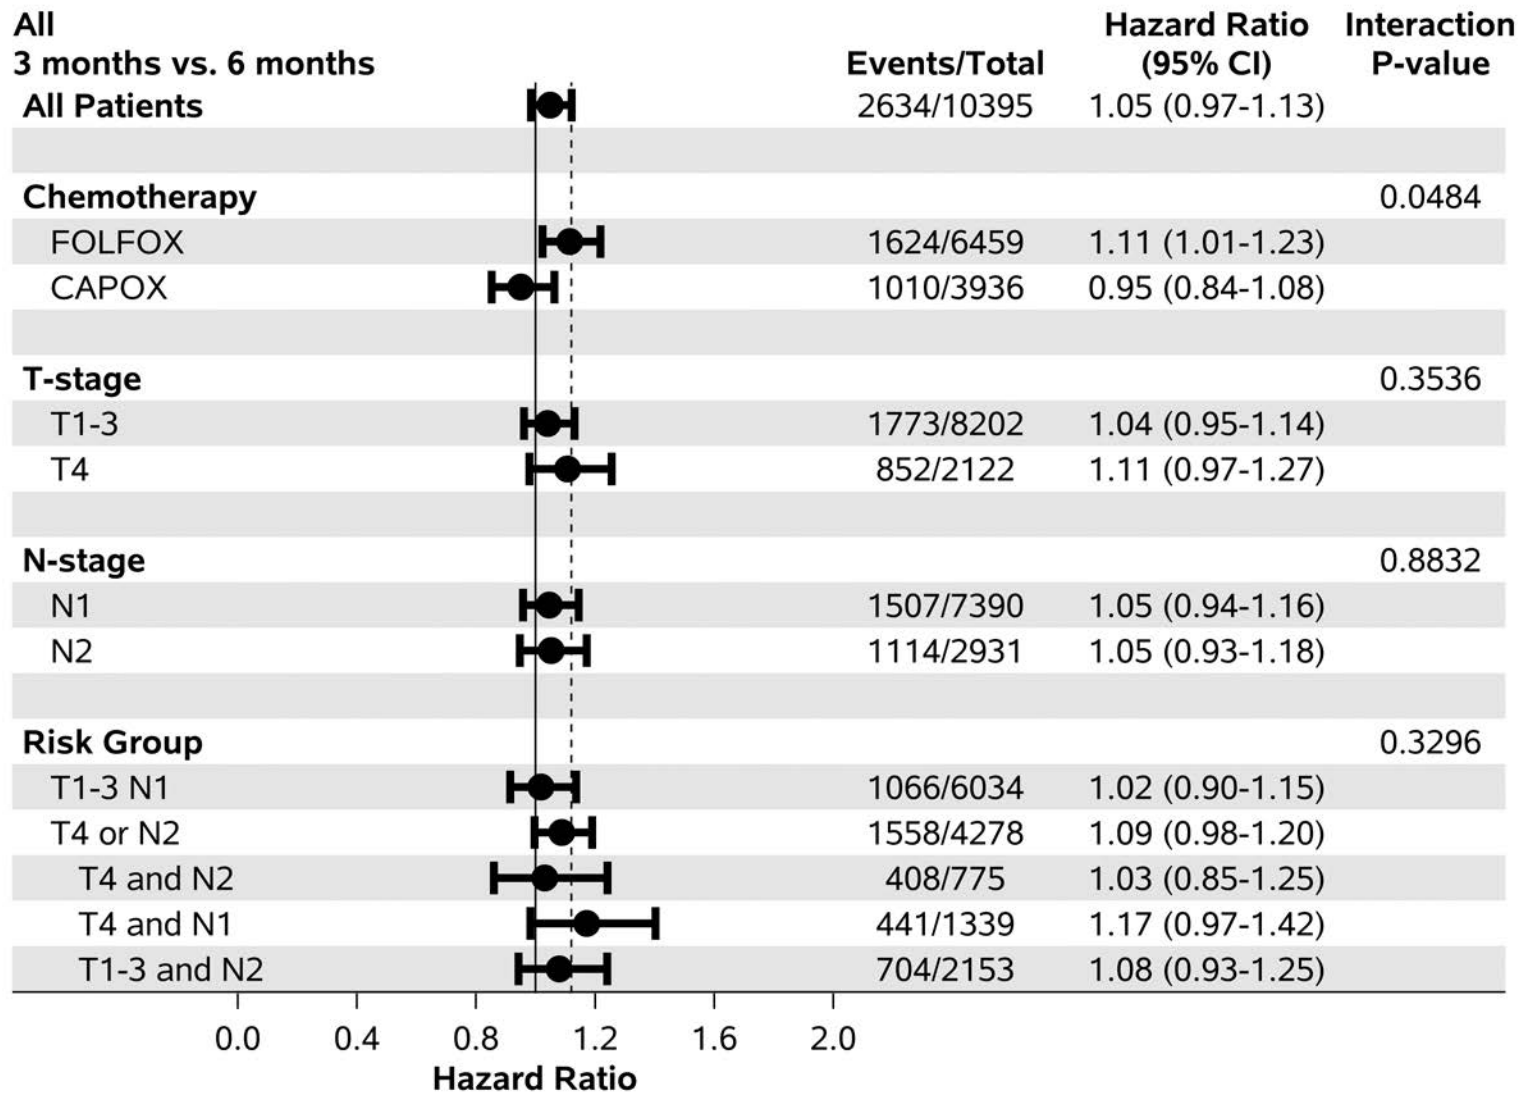



**Supplemental Figure 5: Comparing DFS between patients assigned to 3m vs. 6m of adjuvant treatment (mITT) per subgroup**

Footnote: DFS, disease-free survival; CI, confidence interval; HR, hazard ratio; Sup p, p-value of stratified Log-rank test for two-sided superiority testing; NI p, p-value of stratified non-inferiority testing; 3 year estimate, 3 year DFS rate derived based on Kaplan-Meier estimates; Numbers under the plot are number of patients at risk;

**Supplemental Figure 5A: FOLFOX treated patients**

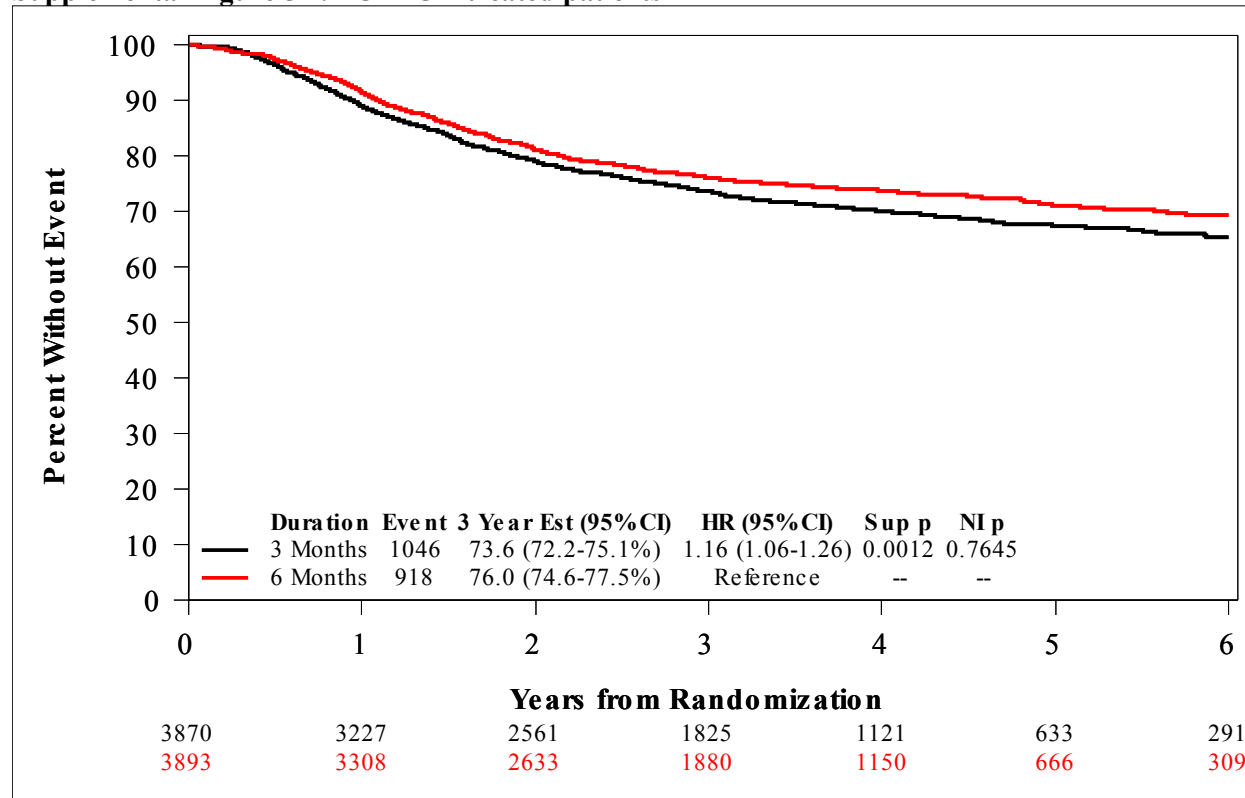

**Supplemental Figure 5B: CAPOX treated patients**

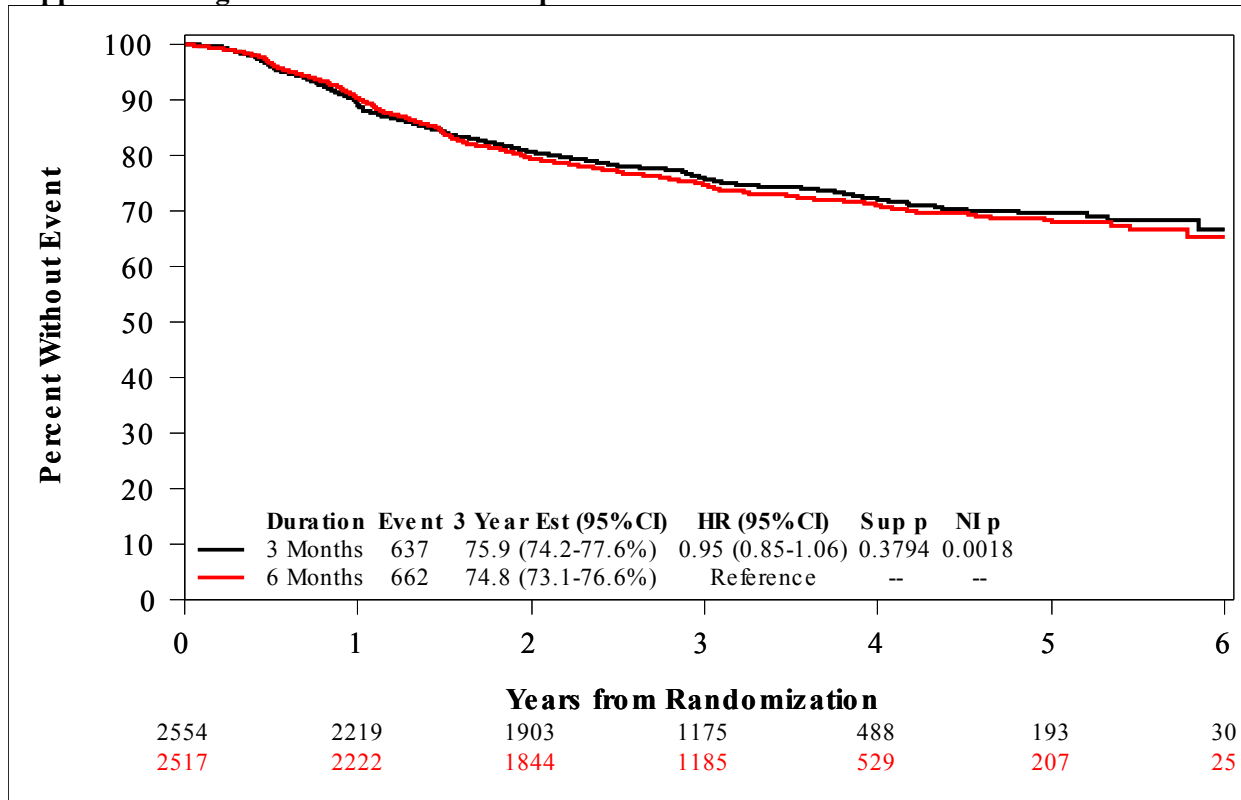

**Supplemental Figure 5C: By N stage (N1 and N2)**

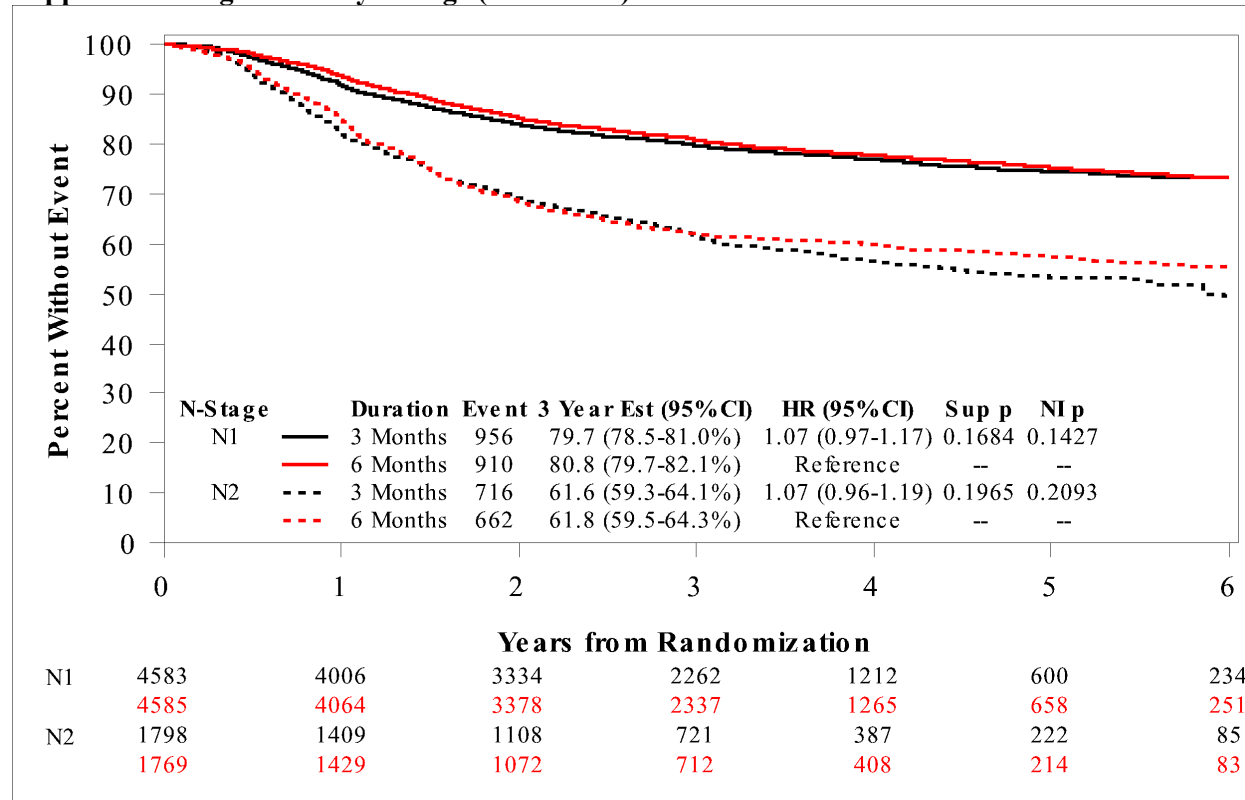

**Supplemental Figure 5D: By T stage (T1-3 and T4)**

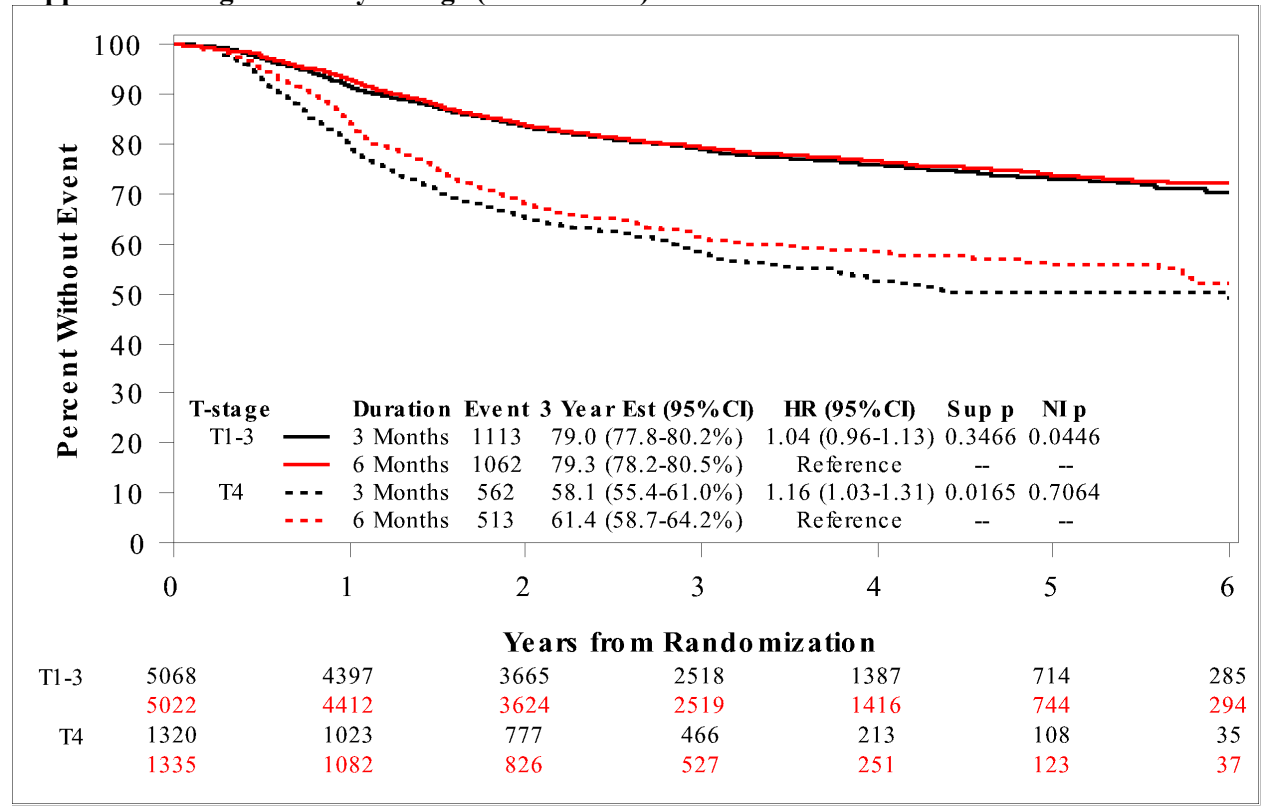

**Supplemental Figure 5E: By risk group (T1-3 N1 and T4 and/or N2)**

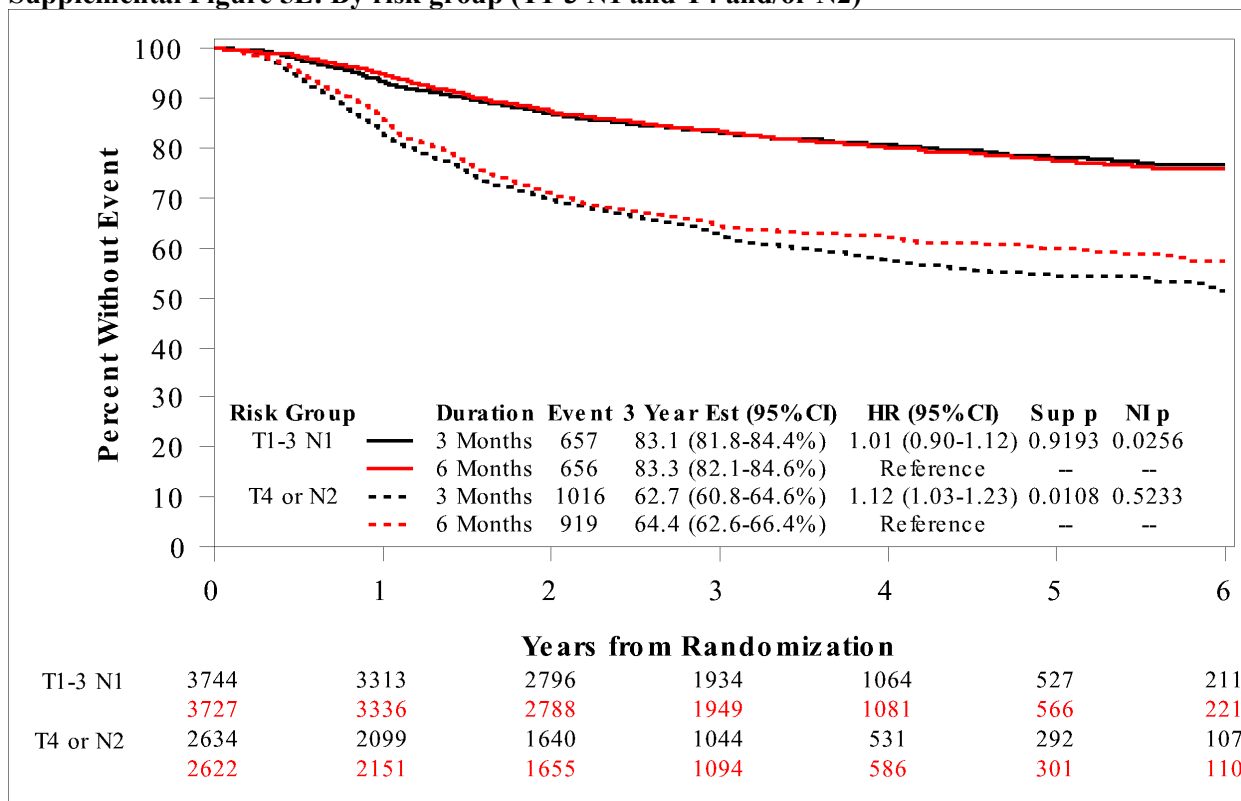

Supplement: NIHMS964359-supplement-tables_figs.pdf [file NIHMS964359-supplement-tables_figs.pdf]
